# Supplementary figures and images for: Identifying canonical and replicable multi‐scale intrinsic connectivity networks in 100k+ resting‐state fMRI datasets
Source: PubMed Central journal article supplement — Hum Brain Mapp. 2023 Oct 3;44(17):5729–48. doi: 10.1002/hbm.26472 (PMC10619392; doi:10.1002/hbm.26472), 2023-10-03

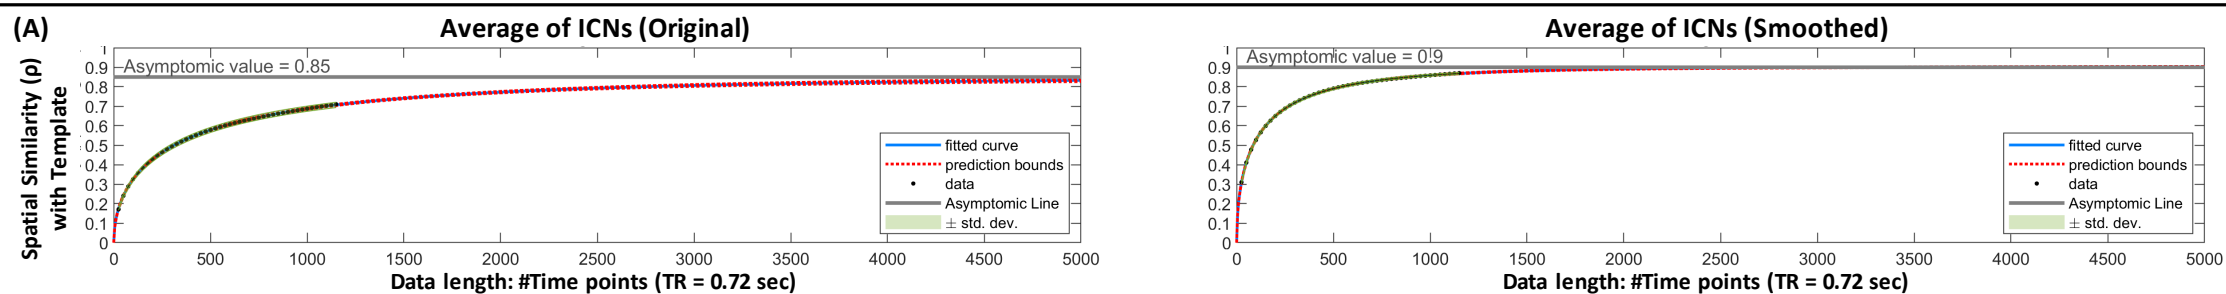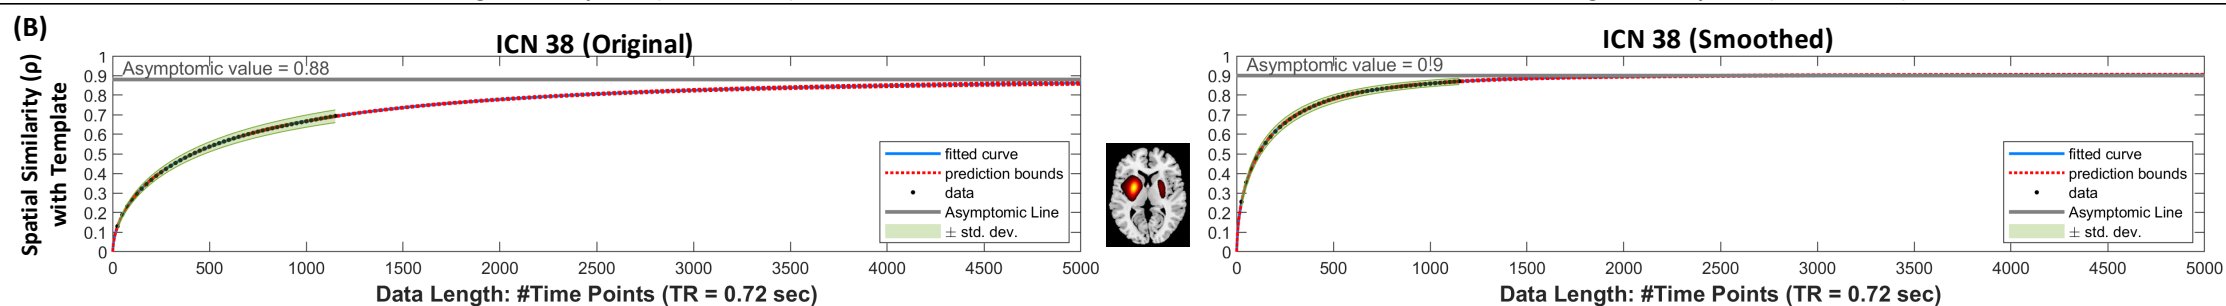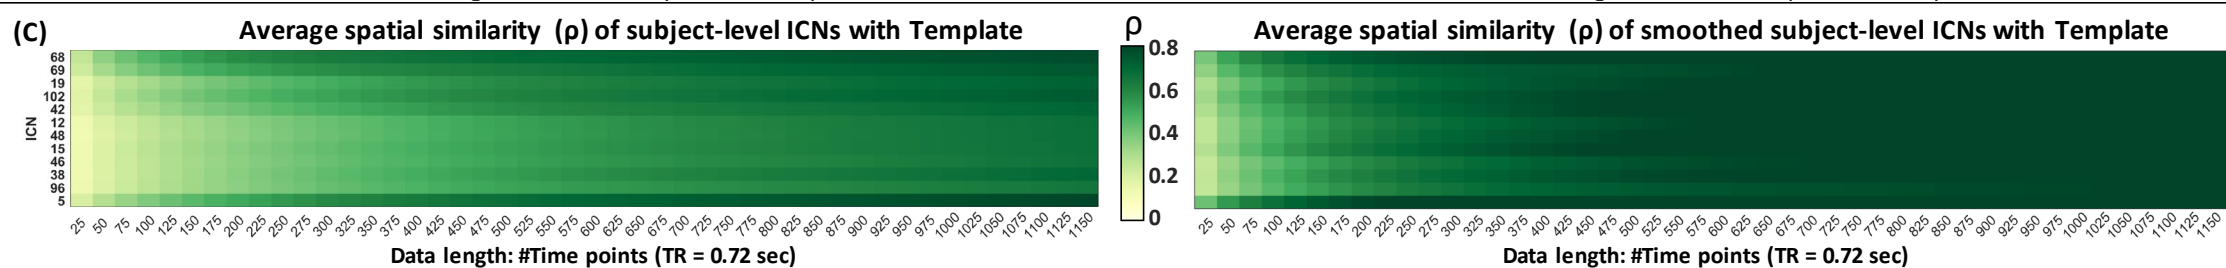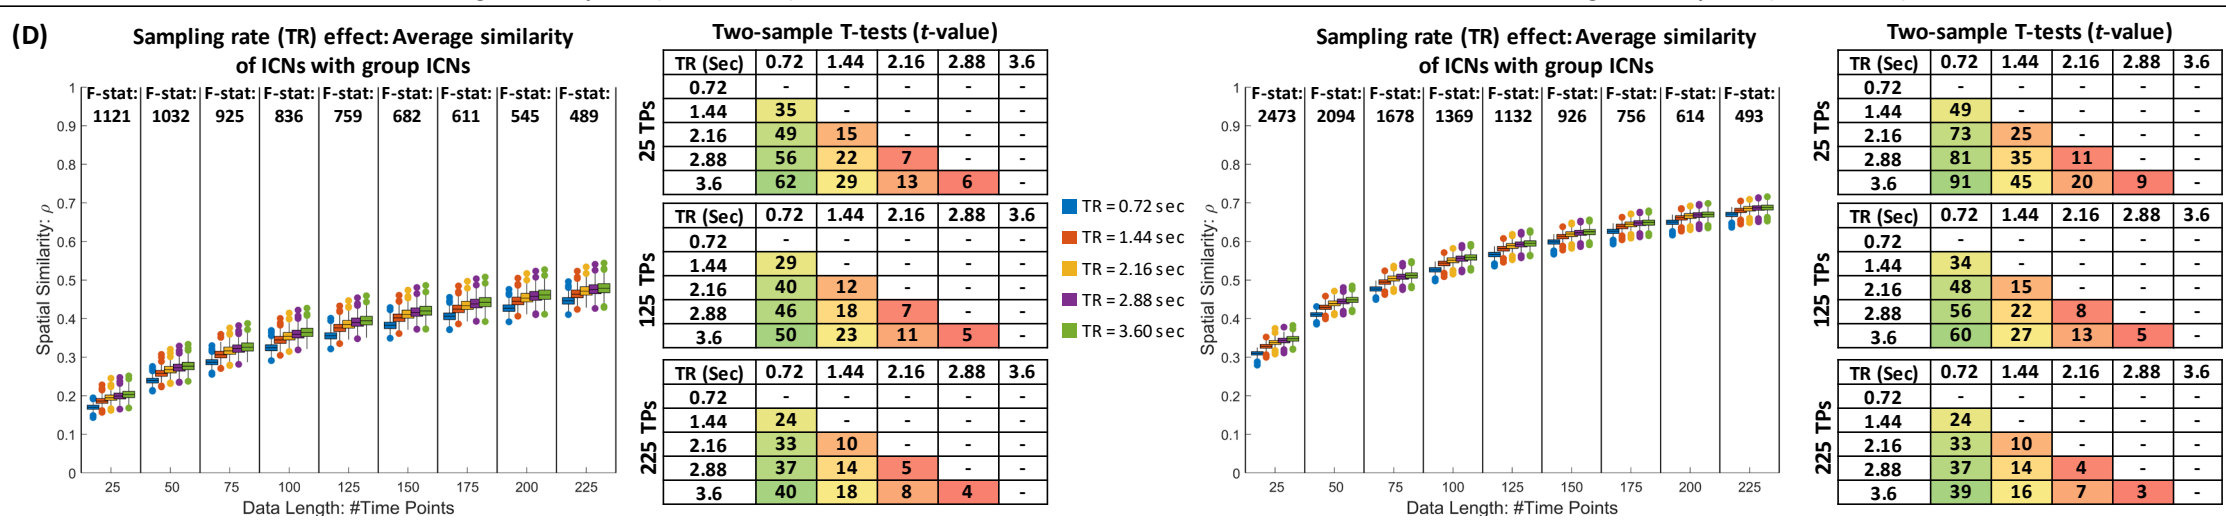

Supplement: HBM-44-5729-s004.pdf [file HBM-44-5729-s004.pdf]

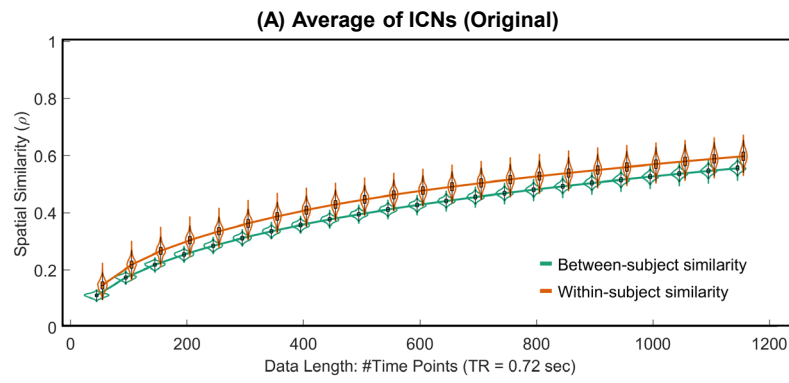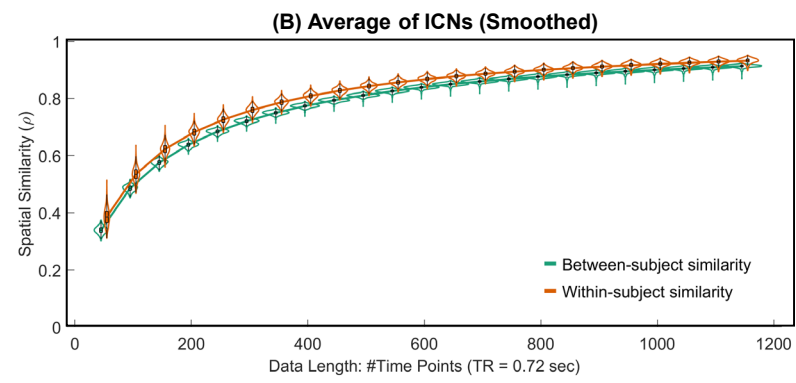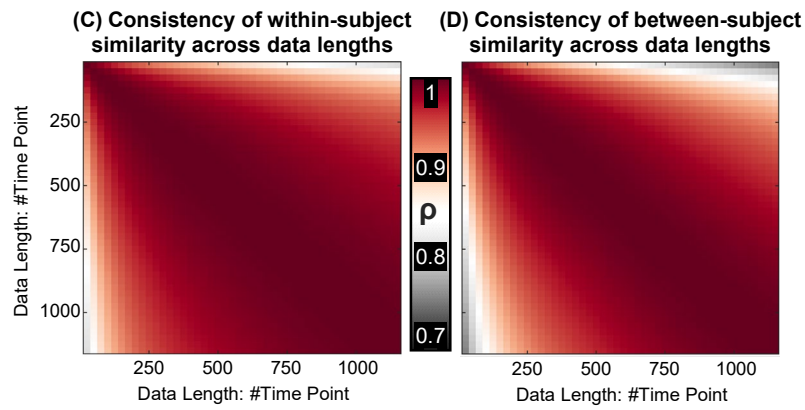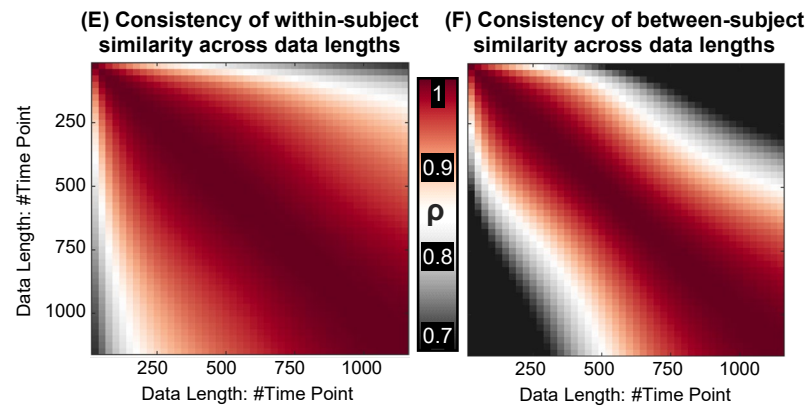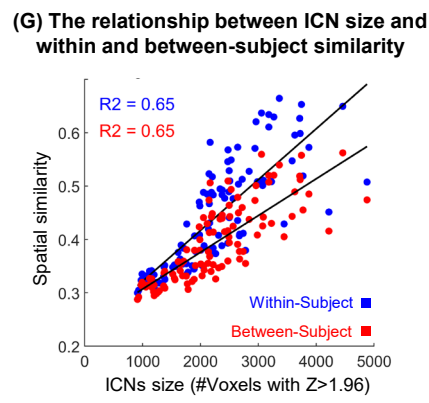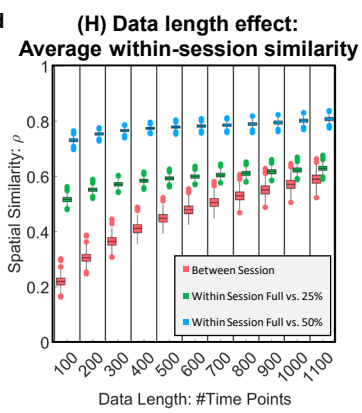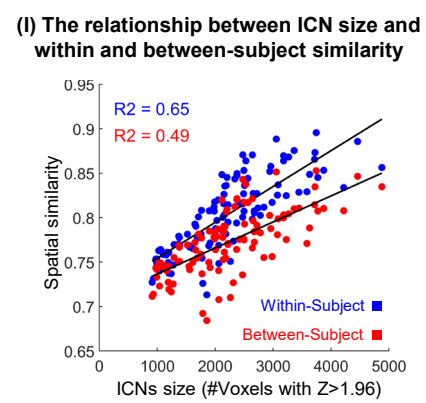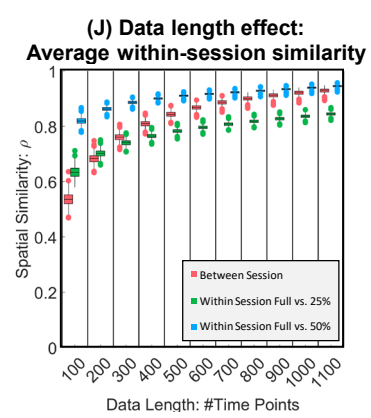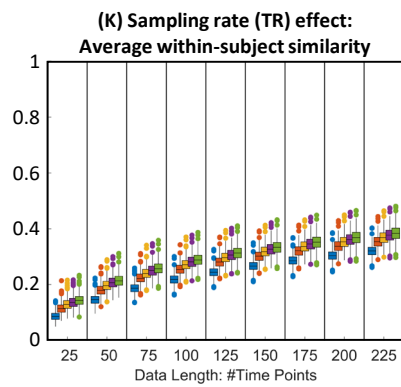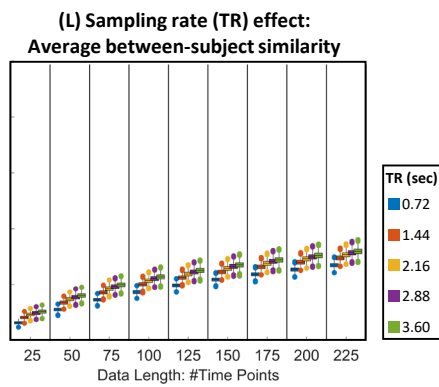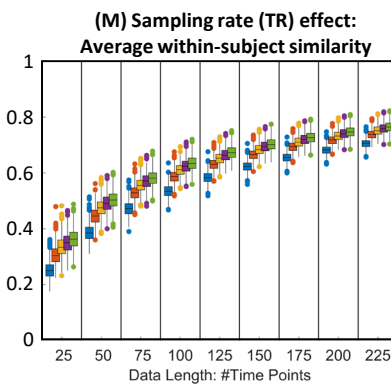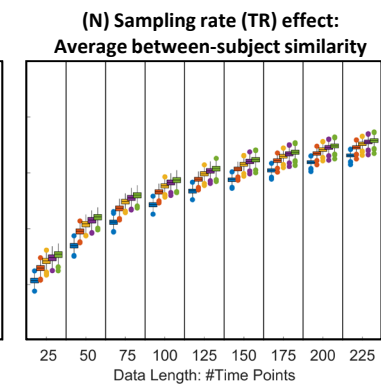

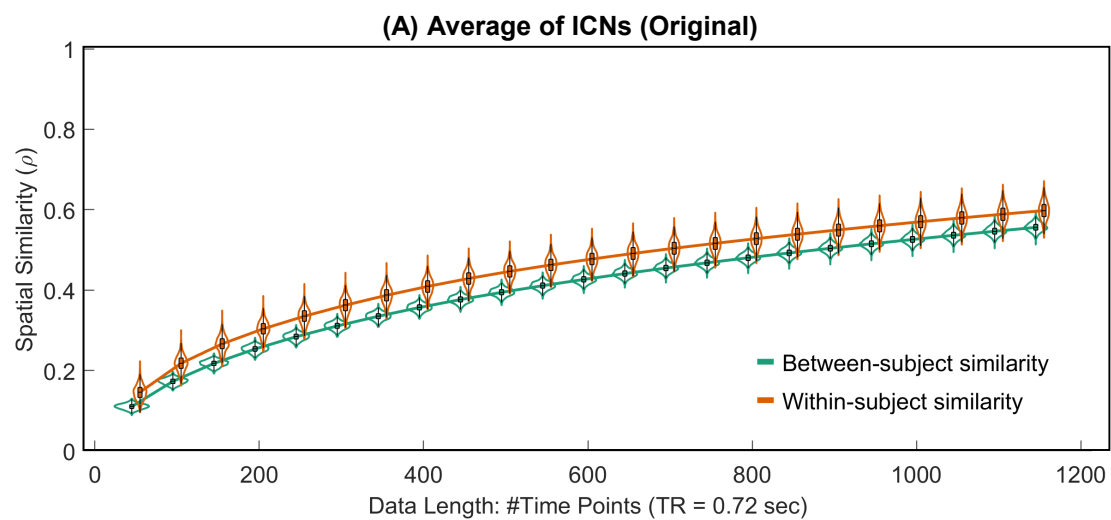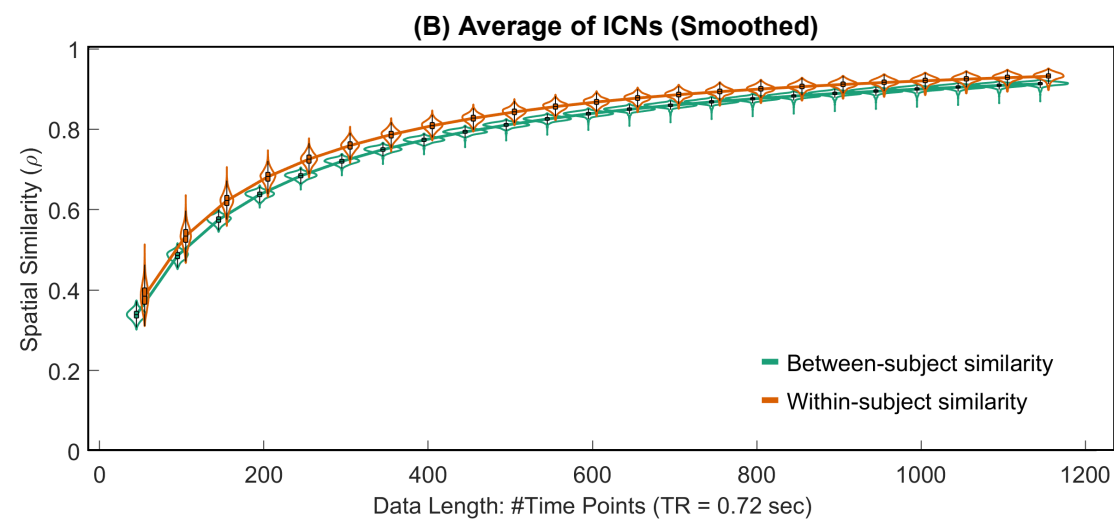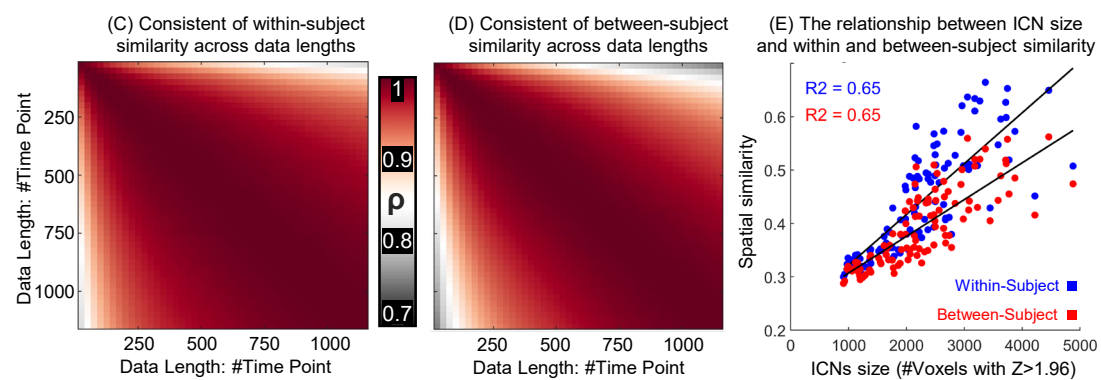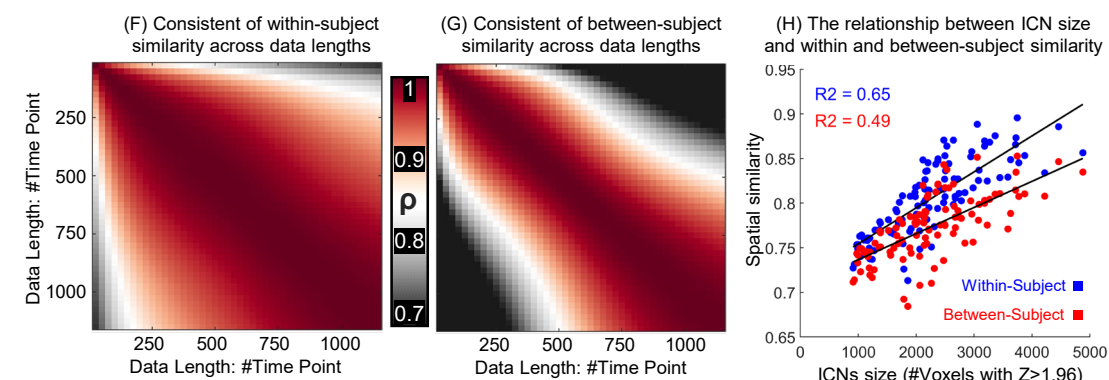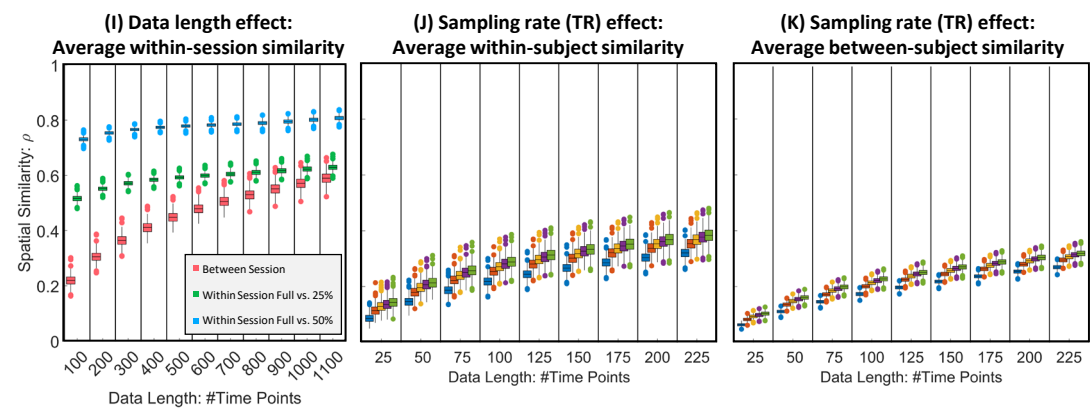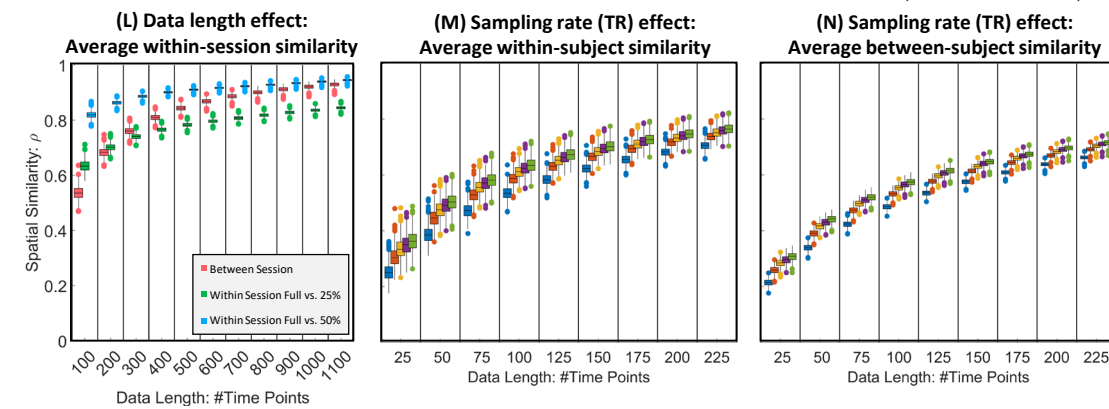

Supplement: HBM-44-5729-s008.pdf [file HBM-44-5729-s008.pdf]
